# Supplementary material for: Electron-Induced Perpendicular Graphene Sheets Embedded Porous Carbon Film for Flexible Touch Sensors
Source: Nanomicro Lett. 2020 Jun 25;12:136. doi: 10.1007/s40820-020-00480-8 (PMC7770710; doi:10.1007/s40820-020-00480-8)
Supplement: Supplementary file 1 — Supplementary material 1 (PDF 593 kb) [file 40820_2020_480_MOESM1_ESM.pdf]

Supporting Information for

## Electron-Induced Perpendicular Graphene Sheets Embedded Porous Carbon Film for Flexible Touch Sensors

Sicheng Chen<sup>1</sup>, Yunfei Wang<sup>1</sup>, Lei Yang<sup>1,\*</sup>, Fouad Karouta<sup>2</sup>, Kun Sun<sup>1</sup>

<sup>1</sup>Key Laboratory of Education Ministry for Modern Design and Rotor-Bearing System, Xi'an Jiaotong University, Xi'an 710049, People's Republic of China

<sup>2</sup>Research School of Physics, The Australian National University, Canberra, 2601 ACT Australia

\*Corresponding author. E-mail: [yanglxjtu@xjtu.edu.cn](mailto:yanglxjtu@xjtu.edu.cn) (Lei Yang)

### Supplementary Figures

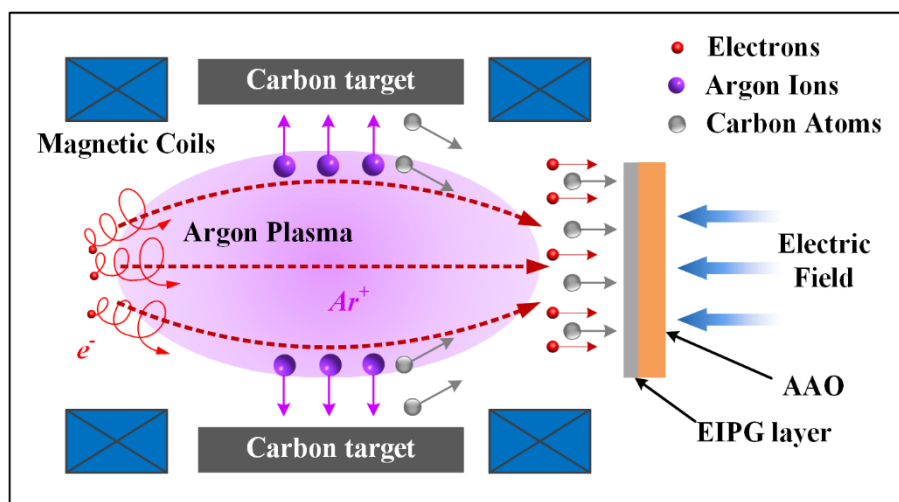

**Fig. S1** Schematic illustrations of the ECR sputtering system

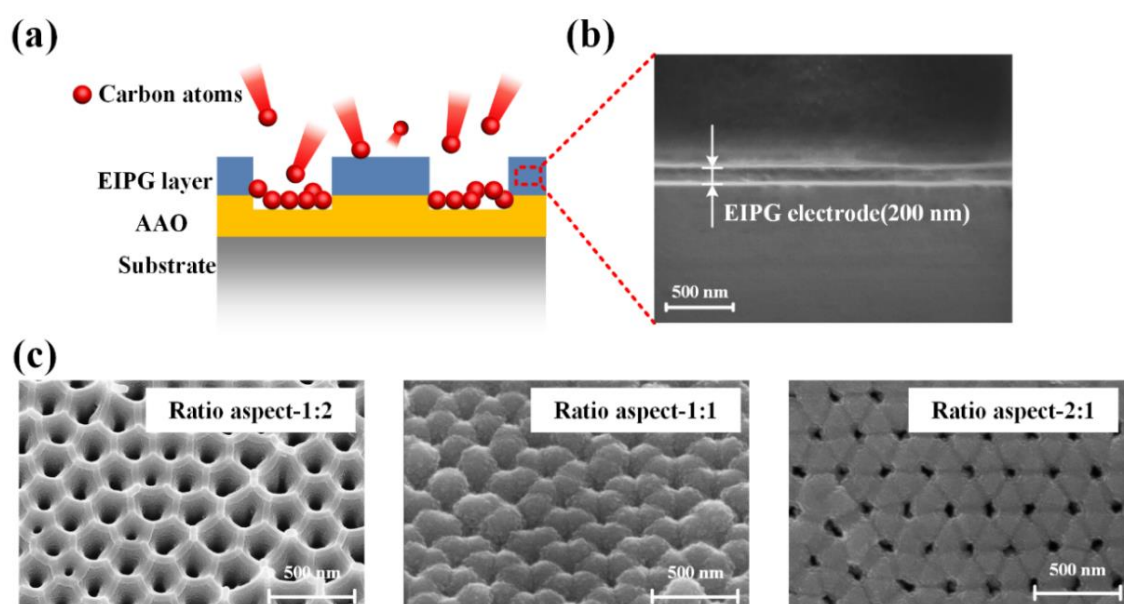

**Fig. S2** **a** Schematics of accumulating carbon atoms and **b** Field-emission scanning electron micrographs of EIPG cross-section geometry and **c** Morphology of EIG layers under different ratio aspect (Ratio aspect=pit-depth/pit-diameter)

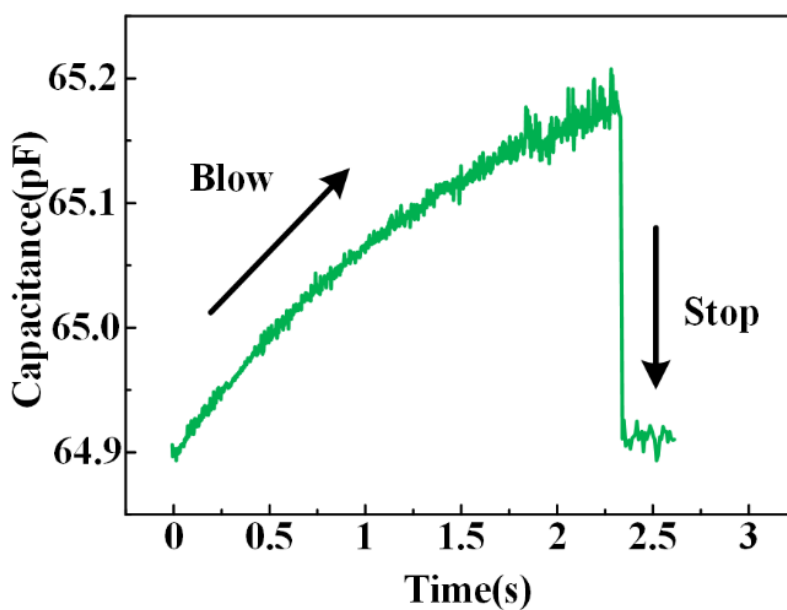

**Fig. S3** Capacitance change when blowing on the sensor

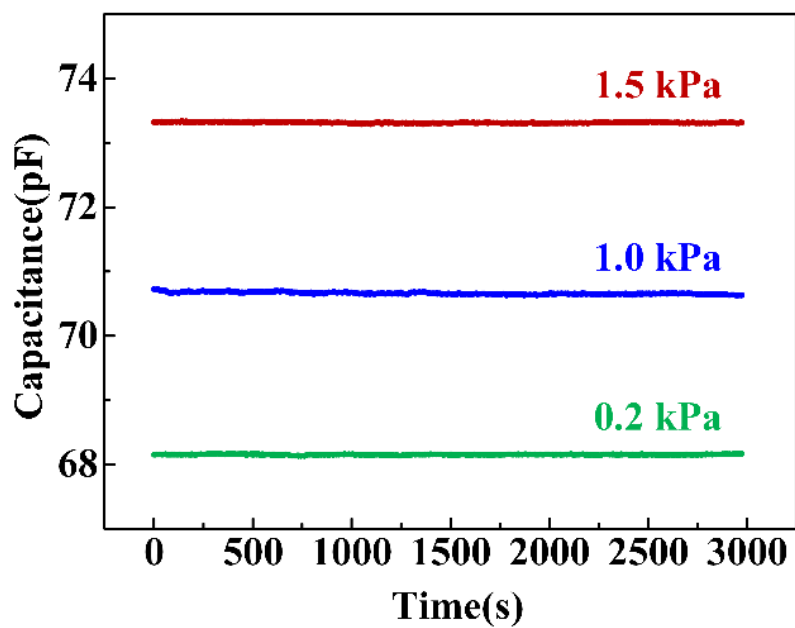

**Fig. S4** Durability of capacitance under long-time loading process

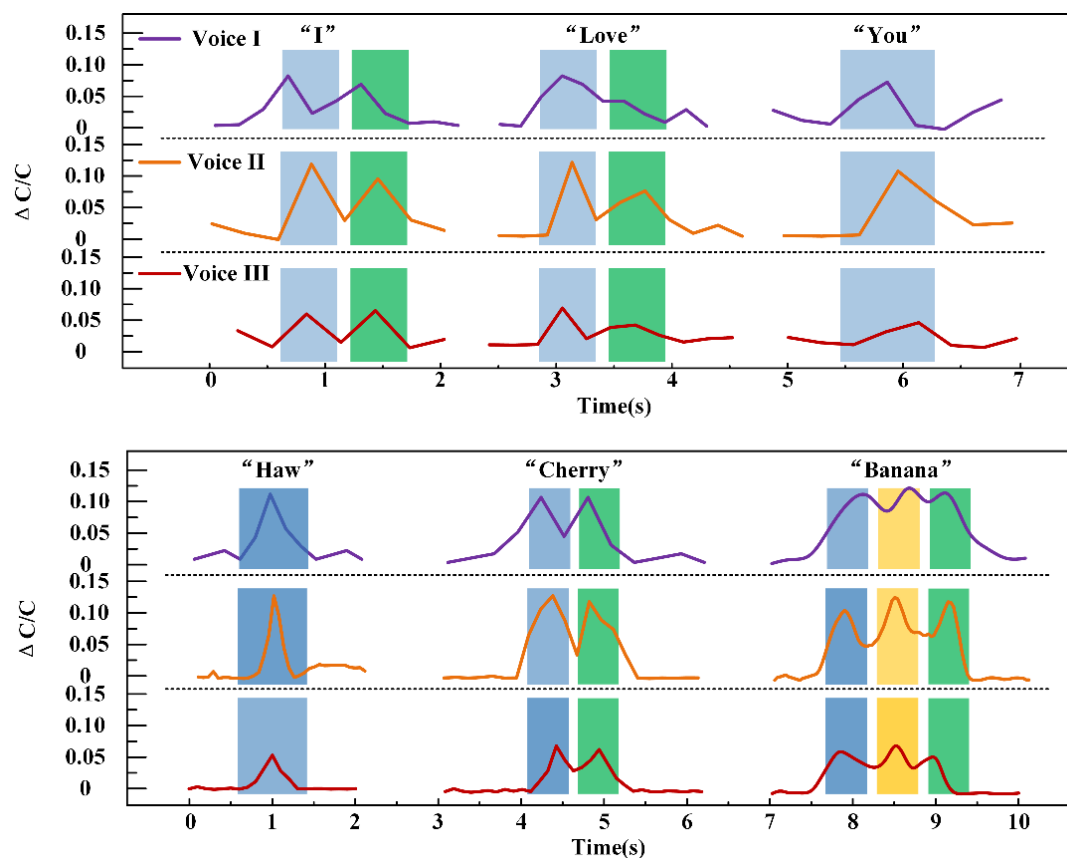

**Fig. S5** Sound detection application of the EIPG sensor

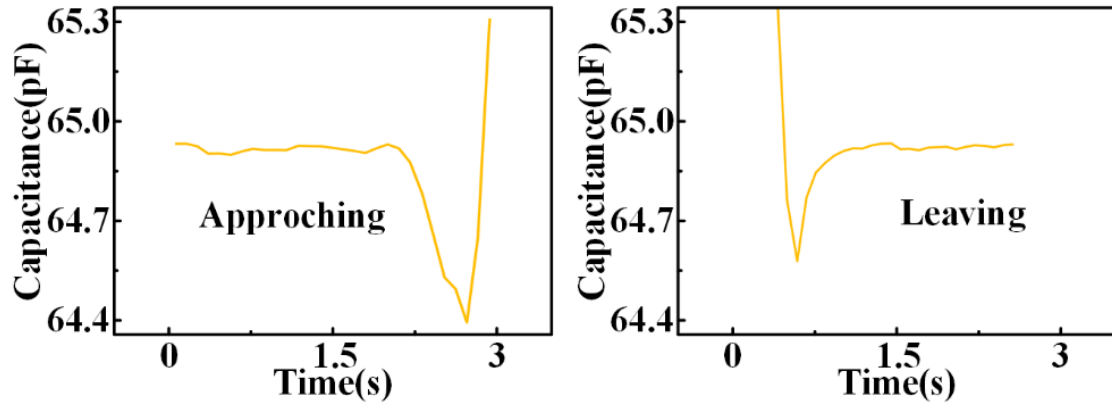

**Fig. S6** Capacitance changes when approaching and leaving (Capacitance decreased rapidly when adjacent objects approach, like hyperbolic curve as the element of “ $1/D$ ”, the turning point of leaving is slightly higher than that of approaching for the charge exchange between capacitance surface and adjacent object)

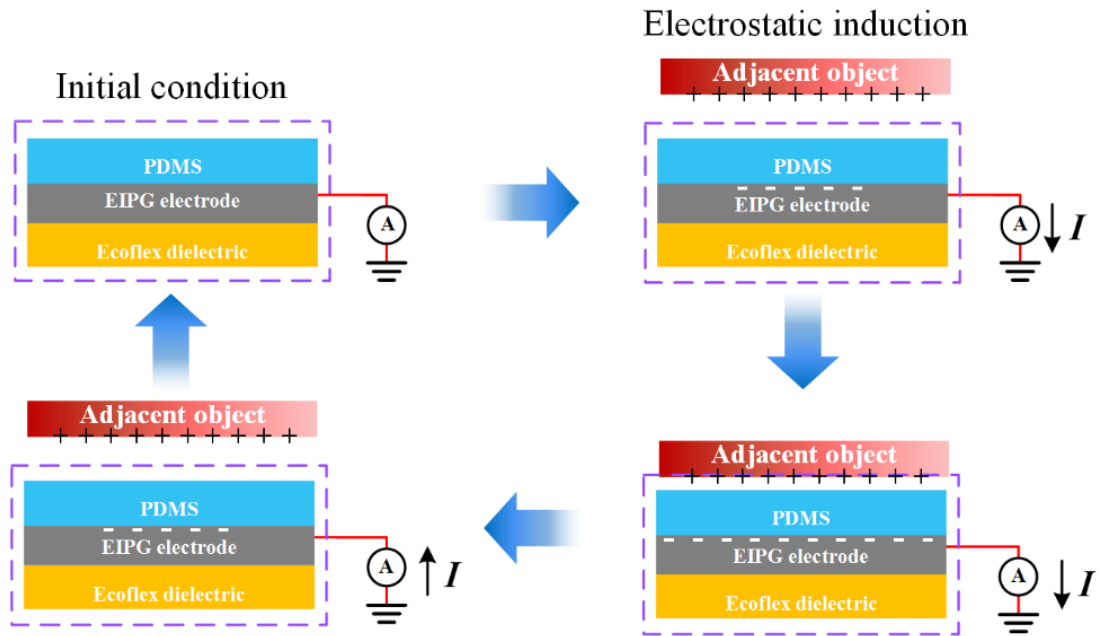

**Fig. S7** Schematic illustrations for the working process of bimodal function when detecting adjacent objects using single-electrode connection
